# Supplementary material for: The effect of journal guidelines on the reporting of antibody validation
Source: PeerJ. 2020 Jun 3;8:e9300. doi: 10.7717/peerj.9300 (PMC7275675; doi:10.7717/peerj.9300)
Supplement: Data S1 — Antibody information was noted down for all 120 publications by answering a set of questions. The coding process is described in Article S2. In the data set, the value 1 means yes, 0 means no, 9 means not applicable, 999 means not clear. [file peerj-08-9300-s005.xlsx]

## Sheet: Antibody data
Nr	DOI	URL	Journal	Journalnr	with_guidelines	Times_cited	Date_published	after_guidelines	Date_received	Section_devoted_to_abs	How_many_different_abs_used	Application_using_abs	Commercial_abs	Abs_byresearchers	Ab_info_present	Basic_ab_info_complete_commercial	Basic_ab_info_complete_noncommercial	Basic_info_all_primary_abs_complete	Basic_info_all_primary_abs_complete_na_no	Validation_info_present	Proof_validation_present	How_many_abs_validated	percentage_abs_validated	Place_info_validation	Validation_some_abs_not_others	Different_types_validation_different_abs	Multiple_types_validation_per_ab	All_primary_ab_validated	All_primary_ab_validated_na_no	Reference_validation_supplier	Reference_validation_literature	Reference_validation_database	Validation_by_researcher	MW_WB	Spatial_localization	Preadsorption	Secondary_without_primary	Protein_array	ISH	Other_RNA_method	Tissuemicroarray	Epitopemapping	Affinitymeasurement	Five_pillars	Genetic	Orthogonal	Independent_ab	Expression_tagged_protein	Immunocapture_MS
1	10.1002/cne.10467	http://doi.org/10.1002/cne.10467	JCN	1	1	53	2002-12-23	0	2002-04-03	0	3	IHC	1	999	1	0	9	0	0	0	9	0	0	9	9	9	9	9	0	9	9	9	9	9	9	9	9	9	9	9	9	9	9	9	9	9	9	9	9
2	10.1002/cne.10566	http://doi.org/10.1002/cne.10566	JCN	1	1	79	2003-03-24	0	2002-09-10	0	7	ICC	1	1	1	0	0	0	0	1	1	7	100	main	0	0	0	1	1	0	999	0	1	0	0	0	1	0	0	0	0	0	0	0	9	9	9	9	9
4	10.1016/S0306-4522(02)00296-8	http://doi.org/10.1016/S0306-4522(02)00296-8	Neuroscience	3	0	20	2002-11-01	0	2001-11-14	0	1	ISH	999	999	0	9	9	9	0	0	9	0	0	9	9	9	9	9	0	9	9	9	9	9	9	9	9	9	9	9	9	9	9	9	9	9	9	9	9
5	10.1038/nature01733	http://doi.org/10.1038/nature01733	Nature	2	1	228	2003-07-03	0	2003-02-09	1	3	Labeled cryostat sections	999	1	1	999	1	0	0	1	1	2	66.6667	main	1	0	1	0	0	0	0	0	1	0	0	0	0	0	0	0	0	0	0	1	1	0	1	0	0
6	10.1038/nature00859	http://doi.org/10.1038/nature00859	Nature	2	1	514	2002-08-15	0	2002-02-22	1	5	WB; IP (immunoaffinity purification)	1	1	1	0	1	0	0	1	1	1	20	main	1	9	0	0	0	0	0	0	1	0	0	0	0	0	0	0	0	0	0	1	0	0	0	0	1
7	10.1126/science.1079914	http://doi.org/10.1126/science.1079914	Science	4	0	207	2003-01-24	0	2002-10-29	0	3	IF; ChIP	999	999	1	0	0	0	0	1	1	1	33.3333	main;SI	1	9	1	0	0	0	0	0	1	0	0	0	0	0	0	0	0	0	0	1	1	0	0	1	0
8	10.1126/science.1073405	http://doi.org/10.1126/science.1073405	Science	4	0	58	2002-12-06	0	2002-04-30	0	6	IP;WB	1	1	1	0	0	0	0	0	9	0	0	9	9	9	9	9	0	9	9	9	9	9	9	9	9	9	9	9	9	9	9	9	9	9	9	9	9
9	10.1002/cne.24181	http://doi.org/10.1002/cne.24181	JCN	1	1	6	2017-06-01	1	2016-11-18	1	25	IHC	1	1	1	0	1	1	1	1	1	999	999	main	1	1	1	999	999	0	1	0	1	0	0	1	1	0	0	0	0	0	0	1	0	0	1	0	0
10	10.1002/cne.24408	http://doi.org/10.1002/cne.24408	JCN	1	1	0	2018-06-01	1	2017-06-06	1	19	ICC; IHC	1	1	1	0	1	1	1	1	1	9	47.3684	main	1	1	1	1	1	0	1	0	1	0	1	0	1	0	0	0	0	0	0	1	1	1	1	0	0
11	10.1016/j.neuroscience.2018.02.047	http://doi.org/10.1016/j.neuroscience.2018.02.047	Neuroscience	3	0	0	2018-05-01	1	2016-09-16	0	8	WB; IHC	1	0	1	1	9	1	1	1	1	1	12.5	main	1	9	0	0	0	0	0	0	1	0	0	0	0	0	0	0	0	0	0	1	1	0	0	0	0
12	10.1016/j.neuroscience.2017.07.020	http://doi.org/10.1016/j.neuroscience.2017.07.020	Neuroscience	3	0	1	2017-09-17	1	2017-05-06	0	2	ICC	1	0	1	0	9	0	0	0	9	0	0	9	9	9	9	9	0	9	9	9	9	9	9	9	9	9	9	9	9	9	9	9	9	9	9	9	9
13	10.1126/science.aan1121	http://doi.org/10.1126/science.aan1121	Science	4	0	4	2017-09-15	1	2017-03-06	0	6	ChIP; WB; protein extraction	1	0	1	1	9	1	1	1	1	1	16.6667	SI	1	9	1	0	0	0	0	0	1	0	0	0	0	0	0	1	0	0	0	1	1	1	0	0	0
14	10.1126/science.aam6125	http://doi.org/10.1126/science.aam6125	Science	4	0	0	2017-01-19	1	2017-11-03	0	14	immunostaining (IF?)	1	0	1	0	0	1	1	1	1	2	14.2857	SI	1	0	1	0	0	0	0	0	1	0	0	1	0	0	0	0	0	0	0	0	9	9	9	9	9
15	10.1002/cne.10597	http://doi.org/10.1002/cne.10597	JCN	1	1	29	2003-04-14	0	2002-02-19	0	9	IHC	1	1	1	0	0	0	0	0	9	0	0	9	9	9	9	9	0	9	9	9	9	9	9	9	9	9	9	9	9	9	9	9	9	9	9	9	9
16	10.1002/cne.10655	http://doi.org/10.1002/cne.10655	JCN	1	1	55	2003-05-26	0	2002-09-30	0	4	IHC	1	0	1	0	9	0	0	1	1	4	100	main	0	1	0	1	1	0	0	0	1	0	0	1	1	0	0	0	0	0	0	0	9	9	9	9	9
17	10.1016/S0306-4522(02)00318-4	http://doi.org/10.1016/S0306-4522(02)00318-4	Neuroscience	3	0	26	2002-10-11	0	2001-11-12	0	4	IHC	1	0	1	0	9	0	0	1	1	3	75	main	1	1	1	1	1	0	1	0	0	9	9	9	9	9	9	9	9	9	9	9	9	9	9	9	9
18	10.1016/S0306-4522(02)00957-0	http://doi.org/10.1016/S0306-4522(02)00957-0	Neuroscience	3	0	15	2003-04-10	0	2002-10-17	0	3	IF; WB	1	0	1	0	9	0	0	0	9	0	0	9	9	9	9	9	0	9	9	9	9	9	9	9	9	9	9	9	9	9	9	9	9	9	9	9	9
19	10.1038/nature01458	http://doi.org/10.1038/nature01458	Nature	2	1	400	2003-03-20	0	2002-11-06	0	13	IHC; ISH; WB; ChIP	1	1	1	0	0	0	0	1	1	2	15.3846	main	1	1	0	0	0	0	0	0	1	0	0	0	0	0	0	0	0	0	0	1	1	0	0	0	0
20	10.1038/nature01417	http://doi.org/10.1038/nature01417	Nature	2	1	275	2003-02-27	0	2002-10-17	0	1	IHC	1	0	1	0	9	0	0	0	9	0	0	9	9	9	9	9	0	9	9	9	9	9	9	9	9	9	9	9	9	9	9	9	9	9	9	9	9
21	10.1126/science.1077650	http://doi.org/10.1126/science.1077650	Science	4	0	354	2002-12-20	0	2002-08-22	0	2	WB	1	0	1	0	9	1	1	0	9	0	0	9	9	9	9	9	0	9	9	9	9	9	9	9	9	9	9	9	9	9	9	9	9	9	9	9	9
22	10.1126/science.1073263	http://doi.org/10.1126/science.1073263	Science	4	0	185	2002-08-16	0	2002-04-24	0	7	IHC	999	999	0	9	9	9	0	0	9	0	0	9	9	9	9	9	0	9	9	9	9	9	9	9	9	9	9	9	9	9	9	9	9	9	9	9	9
23	10.1002/cne.24250	http://doi.org/10.1002/cne.24250	JCN	1	1	1	2017-10-01	1	2017-02-01	1	12	IF (fluorescent immunostaining); immunostaining	1	1	1	1	1	1	1	1	1	6	50	main	1	1	1	1	1	1	1	0	1	1	1	0	0	0	0	0	0	0	0	1	1	0	1	0	0
24	10.1002/cne.24411	http://doi.org/10.1002/cne.24411	JCN	1	1	0	2018-06-01	1	2017-06-30	1	10	IHC	1	0	1	1	9	1	1	1	1	10	100	main	0	1	1	1	1	1	1	0	1	1	1	0	1	0	0	0	0	0	0	0	9	9	9	9	9
25	10.1016/j.neuroscience.2017.08.053	http://doi.org/10.1016/j.neuroscience.2017.08.053	Neuroscience	3	0	1	2017-11-05	1	2017-03-30	0	5	IP;WB	1	0	1	0	9	0	0	1	1	2	40	main	1	1	1	0	0	0	0	0	1	1	0	0	0	0	0	0	0	0	0	1	1	0	0	0	0
26	10.1016/j.neuroscience.2017.04.021	http://doi.org/10.1016/j.neuroscience.2017.04.021	Neuroscience	3	0	0	2017-06-23	1	2016-12-15	0	2	IHC	1	0	1	1	9	1	1	0	9	0	0	9	9	9	9	9	0	9	9	9	9	9	9	9	9	9	9	9	9	9	9	9	9	9	9	9	9
27	10.1126/science.aar2781	http://doi.org/10.1126/science.aar2781	Science	4	0	0	2018-01-19	1	2017-10-20	0	10	IF; WB	1	1	1	0	1	1	1	1	1	1	10	SI	1	9	0	0	0	0	0	0	1	0	0	0	0	0	0	0	0	0	0	1	1	0	0	0	0
28	10.1126/science.aan3269	http://doi.org/10.1126/science.aan3269	Science	4	0	2	2017-09-22	1	2017-03-28	1	11	ChIP; WB	1	1	1	0	0	0	0	1	1	1	9.09091	SI	1	9	0	0	0	0	0	0	1	0	0	0	0	0	0	0	0	0	0	1	1	0	0	0	0
29	10.1002/cne.10652	http://doi.org/10.1002/cne.10652	JCN	1	1	180	2003-06-02	0	2002-07-23	0	4	IF; electron microscopy	1	0	1	0	9	1	1	1	1	4	100	main	0	1	1	1	1	0	1	0	1	0	0	1	1	0	0	0	0	0	0	0	9	9	9	9	9
30	10.1002/cne.10363	http://doi.org/10.1002/cne.10363	JCN	1	1	13	2002-10-07	0	2002-04-12	0	8	ICC; IHC	1	1	1	0	0	0	0	0	9	0	0	9	9	9	9	9	0	9	9	9	9	9	9	9	9	9	9	9	9	9	9	9	9	9	9	9	9
31	10.1016/S0306-4522(02)00404-9	http://doi.org/10.1016/S0306-4522(02)00404-9	Neuroscience	3	0	154	2002-11-15	0	2002-03-05	0	10	ICC; WB	1	1	1	0	0	0	0	0	9	0	0	9	9	9	9	9	0	9	9	9	9	9	9	9	9	9	9	9	9	9	9	9	9	9	9	9	9
32	10.1016/S0306-4522(02)00264-6	http://doi.org/10.1016/S0306-4522(02)00264-6	Neuroscience	3	0	50	2002-12-09	0	2002-01-11	0	5	ICC; IF	1	1	1	0	1	0	0	1	1	5	100	main	0	1	1	1	1	0	1	0	1	0	0	0	1	0	0	0	0	0	0	0	9	9	9	9	9
33	10.1126/science.1074360	http://doi.org/10.1126/science.1074360	Science	4	0	311	2002-11-01	0	2002-05-24	0	2	WB	1	0	1	0	9	0	0	1	1	1	50	main;SI	1	9	1	0	0	0	0	0	1	1	0	1	0	0	0	0	0	0	0	0	9	9	9	9	9
34	10.1126/science.1076466	http://doi.org/10.1126/science.1076466	Science	4	0	564	2002-09-27	0	2001-07-22	0	3	ChIP;WB	999	999	0	9	9	9	0	0	9	0	0	9	9	9	9	9	0	9	9	9	9	9	9	9	9	9	9	9	9	9	9	9	9	9	9	9	9
35	10.1038/nature01606	http://doi.org/10.1038/nature01606	Nature	2	1	496	2003-05-29	0	2003-02-19	0	12	IP; WB; ChIP; pull down assay; purification	1	0	1	0	9	0	0	1	1	7	58.3333	main	1	1	0	0	0	0	0	0	1	0	0	0	0	0	0	0	0	0	0	0	9	9	9	9	9
36	10.1038/nature00936	http://doi.org/10.1038/nature00936	Nature	2	1	115	2002-08-15	0	2002-04-22	0	2	IP; WB	1	1	1	0	1	0	0	1	0	2	100	main	0	1	1	1	1	0	0	0	1	1	0	0	1	0	0	0	0	0	0	0	9	9	9	9	9
37	10.1002/cne.24391	http://doi.org/10.1002/cne.24391	JCN	1	1	0	2018-04-15	1	2017-10-11	0	2	IHC	1	0	1	0	9	0	0	0	9	0	0	9	9	9	9	9	0	9	9	9	9	9	9	9	9	9	9	9	9	9	9	9	9	9	9	9	9
38	10.1002/cne.24365	http://doi.org/10.1002/cne.24365	JCN	1	1	0	2018-03-01	1	2016-11-26	1	11	IHC;ICC	1	0	1	0	9	1	1	1	1	7	63.6364	main	1	0	0	0	0	0	1	0	0	9	9	9	9	9	9	9	9	9	9	9	9	9	9	9	9
39	10.1016/j.neuroscience.2018.03.045	http://doi.org/10.1016/j.neuroscience.2018.03.045	Neuroscience	3	0	0	2018-06-01	1	2018-03-06	0	13	IHC	1	0	1	0	9	0	0	0	9	0	0	9	9	9	9	9	0	9	9	9	9	9	9	9	9	9	9	9	9	9	9	9	9	9	9	9	9
40	10.1016/j.neuroscience.2017.06.023	http://doi.org/10.1016/j.neuroscience.2017.06.023	Neuroscience	3	0	1	2017-09-01	1	2017-04-05	0	6	IHC;WB	1	0	1	0	9	1	1	0	9	0	0	9	9	9	9	9	0	9	9	9	9	9	9	9	9	9	9	9	9	9	9	9	9	9	9	9	9
41	10.1038/s41586-018-0083-5	http://doi.org/10.1038/s41586-018-0083-5	Nature	2	1	0	2018-05-10	1	2017-07-25	1	2	WB; purification	1	0	1	0	9	0	0	1	1	1	50	SI	1	9	1	0	0	0	0	0	1	0	0	0	0	0	0	0	0	0	0	999	999	0	0	0	0
42	10.1038/nature24484	http://doi.org/10.1038/nature24484	Nature	2	1	0	2017-11-16	1	2016-07-31	1	28	WB; IF; IP; flow cytometry ; proximity ligation; purification	1	0	1	0	9	0	0	1	1	7	25	SI	1	1	0	0	0	0	0	0	1	0	0	0	0	0	0	0	0	0	0	1	1	0	0	0	0
43	10.1038/nature23318	http://doi.org/10.1038/nature23318	Nature	2	1	4	2017-08-17	1	2016-08-20	1	9	WB; IF	1	1	1	0	0	0	0	1	1	3	33.3333	SI	1	0	0	0	0	0	0	0	1	0	0	0	0	0	0	0	0	0	0	1	1	0	0	1	0
44	10.1038/s41586-018-0024-3	http://doi.org/10.1038/s41586-018-0024-3	Nature	2	1	0	2018-04-26	1	2017-01-26	1	1	IHC	1	0	1	1	9	1	1	1	1	1	100	SI	0	9	0	1	1	0	1	0	0	9	9	9	9	9	9	9	9	9	9	9	9	9	9	9	9
45	10.1038/nature24300	http://doi.org/10.1038/nature24300	Nature	2	1	2	2017-11-02	1	2016-08-15	1	5	WB; ChIP	1	0	1	1	9	1	1	1	0	5	100	SI	0	1	1	1	1	999	1	0	1	0	0	0	0	0	0	0	0	0	0	1	1	0	0	0	0
46	10.1038/nature23670	http://doi.org/10.1038/nature23670	Nature	2	1	6	2017-08-31	1	2017-04-04	1	21	immunoassay ; FACS/flow cytometry ; surface staining; ELISA ; WB	1	0	1	999	9	1	1	1	1	4	19.0476	main	1	1	1	0	0	0	0	0	1	0	0	0	1	0	0	0	0	0	0	1	1	0	0	0	0
47	10.1126/science.aao3099	http://doi.org/10.1126/science.aao3099	Science	4	0	5	2018-01-26	1	2017-07-06	0	16	affinity purification; WB; IP; flow cytometry	1	1	1	0	0	0	0	1	1	6	37.5	SI;main	1	1	0	0	0	0	0	0	1	0	0	0	0	0	0	0	0	0	0	1	1	0	0	0	0
48	10.1126/science.aan0178	http://doi.org/10.1126/science.aan0178	Science	4	0	5	2017-08-04	1	2017-02-20	0	10	affinity purification; WB; IP	1	1	1	0	0	0	0	1	1	3	30	SI	1	1	0	0	0	0	0	0	1	0	0	0	0	0	0	0	0	0	0	1	1	0	0	0	0
49	10.1002/cne.10515	http://doi.org/10.1002/cne.10515	JCN	1	1	46	2003-01-20	0	2002-08-19	0	7	ICC; IHC; double immunostaining	1	1	1	0	1	0	0	1	1	1	14.2857	main	1	9	0	0	0	0	0	0	1	0	0	0	0	0	1	0	0	0	0	1	0	1	0	0	0
50	10.1002/cne.10355	http://doi.org/10.1002/cne.10355	JCN	1	1	116	2002-09-30	0	2002-03-21	0	1	immunostaining	1	0	1	0	9	0	0	1	1	1	100	main	0	9	0	1	1	0	0	0	1	0	1	0	0	0	0	0	0	0	0	0	9	9	9	9	9
52	10.1016/S0306-4522(02)00935-1	http://doi.org/10.1016/S0306-4522(02)00935-1	Neuroscience	3	0	75	2003-03-31	0	2002-11-14	0	3	WB	1	0	1	0	9	0	0	0	9	0	0	9	9	9	9	9	0	9	9	9	9	9	9	9	9	9	9	9	9	9	9	9	9	9	9	9	9
53	10.1126/science.1077215	http://doi.org/10.1126/science.1077215	Science	4	0	319	2003-02-07	0	2002-08-12	0	2	IP;WB	999	1	1	0	0	0	0	1	1	1	50	SI;main	1	9	1	1	1	0	0	0	1	0	0	0	1	0	0	0	0	0	0	1	1	0	0	0	0
54	10.1126/science.1081418	http://doi.org/10.1126/science.1081418	Science	4	0	99	2003-05-09	0	2002-12-11	0	4	Nuclear localization; WB	1	1	1	0	0	0	0	0	9	0	0	9	9	9	9	9	0	9	9	9	9	9	9	9	9	9	9	9	9	9	9	9	9	9	9	9	9
55	10.1038/nature01705	http://doi.org/10.1038/nature01705	Nature	2	1	1950	2003-06-12	0	2002-12-31	0	14	IP;WB	999	999	0	9	9	9	0	1	1	2	14.2857	main	1	0	0	0	0	0	0	0	1	0	0	0	0	0	0	0	0	0	0	1	1	0	0	0	0
56	10.1038/nature01709	http://doi.org/10.1038/nature01709	Nature	2	1	1036	2003-07-03	0	2003-04-14	0	3	IF;WB	1	1	1	0	0	0	0	1	1	1	33.3333	main	1	9	0	0	0	0	0	0	1	0	0	0	0	0	0	0	0	0	0	1	1	0	0	0	0
57	10.1002/cne.24266	http://doi.org/10.1002/cne.24266	JCN	1	1	3	2017-10-01	1	2017-05-17	1	12	IHC	1	1	1	0	1	1	1	1	1	12	100	main	0	1	1	1	1	1	1	0	1	1	0	0	1	0	0	0	0	0	0	1	0	0	1	0	0
58	10.1002/cne.24228	http://doi.org/10.1002/cne.24228	JCN	1	1	1	2017-08-15	1	2017-01-20	1	6	IHC;WB	1	1	1	0	1	1	1	1	1	1	16.6667	main	1	9	1	0	0	0	0	0	1	1	0	1	1	0	0	0	0	0	0	0	9	9	9	9	9
59	10.1016/j.neuroscience.2018.03.026	http://doi.org/10.1016/j.neuroscience.2018.03.026	Neuroscience	3	0	0	2018-05-21	1	2018-01-03	1	6	IHC;IF	1	0	1	1	9	1	1	0	9	0	0	9	9	9	9	9	0	9	9	9	9	9	9	9	9	9	9	9	9	9	9	9	9	9	9	9	9
60	10.1016/j.neuroscience.2018.04.004	http://doi.org/10.1016/j.neuroscience.2018.04.004	Neuroscience	3	0	0	2018-06-01	1	2018-02-08	0	3	WB;IHC	1	1	1	0	1	0	0	1	1	1	33.3333	main	1	9	1	0	0	0	0	0	1	1	0	0	0	0	0	1	0	0	0	1	1	0	0	0	0
61	10.1126/science.aao4165	http://doi.org/10.1126/science.aao4165	Science	4	0	2	2017-12-15	1	2017-07-27	1	18	WB;IHC;IF	1	1	1	0	0	0	0	1	1	10	55.5556	main;SI	1	1	1	0	0	0	0	0	1	0	0	0	0	0	0	0	0	0	0	1	1	0	0	0	0
62	10.1126/science.aan6874	http://doi.org/10.1126/science.aan6874	Science	4	0	1	2017-12-15	1	2017-05-18	0	4	WB;TLC blot	999	999	0	9	9	9	0	0	9	0	0	9	9	9	9	9	0	9	9	9	9	9	9	9	9	9	9	9	9	9	9	9	9	9	9	9	9
63	10.1038/nature24994	http://doi.org/10.1038/nature24994	Nature	2	1	3	2017-12-07	1	2017-03-09	1	5	flow cytometry; WB	1	0	1	0	9	0	0	1	1	3	60	main;SI	1	1	1	0	0	0	0	0	1	1	0	0	1	0	0	0	0	0	0	1	1	0	0	0	0
64	10.1038/nature25005	http://doi.org/10.1038/nature25005	Nature	2	1	5	2017-12-07	1	2017-04-19	1	29	WB;IP	1	0	1	0	9	0	0	1	1	25	86.2069	SI;main	1	1	1	0	0	1	0	0	1	0	0	0	0	0	0	0	0	0	0	1	1	0	1	0	0
65	10.1002/cne.10380	http://doi.org/10.1002/cne.10380	JCN	1	1	46	2002-10-21	0	2002-03-19	0	5	IHC;WB	1	1	1	0	1	0	0	1	1	2	40	main	1	1	1	0	0	0	1	0	1	1	1	0	0	0	1	0	0	0	0	1	0	1	0	0	0
66	10.1002/cne.10692	http://doi.org/10.1002/cne.10692	JCN	1	1	90	2003-06-23	0	2002-08-16	0	10	IHC; immunostaining; cell sorting	1	1	1	0	0	0	0	0	9	0	0	9	9	9	9	9	0	9	9	9	9	9	9	9	9	9	9	9	9	9	9	9	9	9	9	9	9
67	10.1016/S0306-4522(02)00870-9	http://doi.org/10.1016/S0306-4522(02)00870-9	Neuroscience	3	0	72	2003-03-31	0	2002-10-23	0	2	ICC	1	0	1	0	9	1	1	1	1	2	100	main	0	0	1	1	1	0	0	0	1	0	1	1	1	0	0	0	0	0	0	0	9	9	9	9	9
68	10.1016/S0306-4522(03)00063-0	http://doi.org/10.1016/S0306-4522(03)00063-0	Neuroscience	3	0	35	2003-06-06	0	2001-12-18	1	9	WB; IF	1	1	1	0	0	0	0	1	1	1	11.1111	main	1	9	0	0	0	0	0	0	1	1	0	0	0	0	0	0	0	0	0	0	9	9	9	9	9
69	10.1016/S0306-4522(02)00559-6	http://doi.org/10.1016/S0306-4522(02)00559-6	Neuroscience	3	0	15	2003-01-15	0	2002-07-31	0	9	ICC;ISH	1	0	1	0	9	0	0	0	9	0	0	9	9	9	9	9	0	9	9	9	9	9	9	9	9	9	9	9	9	9	9	9	9	9	9	9	9
70	10.1016/S0306-4522(02)00928-4	http://doi.org/10.1016/S0306-4522(02)00928-4	Neuroscience	3	0	5	2003-04-10	0	2002-11-14	0	5	ICC; IF	1	1	1	0	1	0	0	1	1	3	60	main	1	1	1	0	0	0	1	0	1	0	1	1	1	0	0	0	0	0	0	0	9	9	9	9	9
71	10.1126/science.1076997	http://doi.org/10.1126/science.1076997	Science	4	0	1909	2002-11-01	0	2002-08-05	1	10	ELISA ; WB ; IP? ; ChIP	999	1	1	9	0	0	0	1	1	1	10	main;SI	1	9	1	0	0	0	0	0	1	0	0	1	0	0	0	0	0	0	0	0	9	9	9	9	9
72	10.1126/science.1079490	http://doi.org/10.1126/science.1079490	Science	4	0	4867	2003-02-14	0	2002-10-17	1	14	flow cytometry	1	1	1	999	0	0	0	1	1	6	42.8571	SI	1	0	0	0	0	0	0	0	1	0	0	0	1	0	0	0	0	0	0	0	9	9	9	9	9
73	10.1038/nature01552	http://doi.org/10.1038/nature01552	Nature	2	1	768	2003-04-17	0	2002-11-13	0	11	IHC; FACS	1	999	1	0	9	0	0	1	1	5	45.4545	main;SI	1	0	0	0	0	0	0	0	1	0	0	0	1	0	0	0	0	0	0	0	9	9	9	9	9
74	10.1038/nature01119	http://doi.org/10.1038/nature01119	Nature	2	1	465	2002-10-17	0	2002-07-22	1	12	WB; ChIP; IF	1	1	1	0	0	0	0	1	1	4	33.3333	main;SI	1	1	0	0	0	0	0	0	1	0	0	0	0	0	0	0	0	0	0	1	1	0	0	0	0
75	10.1002/cne.24261	http://doi.org/10.1002/cne.24261	JCN	1	1	2	2017-12-15	1	2016-09-07	1	4	IHC	1	0	1	1	9	1	1	1	1	1	25	main	1	9	1	0	0	0	1	0	1	0	1	0	0	0	0	0	0	0	0	1	1	0	0	0	0
76	10.1002/cne.24302	http://doi.org/10.1002/cne.24302	JCN	1	1	0	2017-12-01	1	2017-02-12	1	5	IHC	1	1	1	0	1	1	1	1	1	5	100	main	0	1	1	1	1	0	1	0	1	0	1	1	1	0	0	0	0	0	0	1	0	0	1	0	0
77	10.1016/j.neuroscience.2017.08.008	http://doi.org/10.1016/j.neuroscience.2017.08.008	Neuroscience	3	0	1	2017-10-24	1	2017-06-21	0	8	IF	1	0	1	0	9	0	0	1	1	1	12.5	main	1	9	0	0	0	0	0	0	1	0	1	0	0	0	0	0	0	0	0	1	0	1	0	0	0
78	10.1016/j.neuroscience.2017.10.040	http://doi.org/10.1016/j.neuroscience.2017.10.040	Neuroscience	3	0	0	2017-12-26	1	2017-07-27	0	5	WB	1	0	1	0	9	0	0	0	9	0	0	9	9	9	9	9	0	9	9	9	9	9	9	9	9	9	9	9	9	9	9	9	9	9	9	9	9
79	10.1126/science.aan3174	http://doi.org/10.1126/science.aan3174	Science	4	0	7	2017-09-01	1	2017-03-27	0	11	IHC	1	1	1	0	0	0	0	0	9	0	0	9	9	9	9	9	0	9	9	9	9	9	9	9	9	9	9	9	9	9	9	9	9	9	9	9	9
80	10.1126/science.aan0365	http://doi.org/10.1126/science.aan0365	Science	4	0	6	2017-09-08	1	2017-03-03	1	11	TUNEL assay; flow cytometry	1	0	1	0	9	0	0	0	9	0	0	9	9	9	9	9	0	9	9	9	9	9	9	9	9	9	9	9	9	9	9	9	9	9	9	9	9
81	10.1038/nature25477	http://doi.org/10.1038/nature25477	Nature	2	1	0	2018-02-15	1	2017-01-17	1	4	WB; ChIP	1	0	1	0	9	0	0	1	1	4	100	main;SI	0	1	1	1	1	1	0	0	1	0	0	0	0	0	0	0	0	0	0	1	1	0	0	0	0
82	10.1038/nature25007	http://doi.org/10.1038/nature25007	Nature	2	1	3	2017-12-14	1	2016-10-05	1	12	WB; IP;ChIP; IF	1	1	1	999	1	999	999	1	1	9	75	main;SI	1	1	1	0	0	1	1	0	1	1	0	0	0	0	0	0	0	0	0	1	1	0	1	1	0
83	10.1002/cne.10317	http://doi.org/10.1002/cne.10317	JCN	1	1	13	2002-08-19	0	2002-02-28	1	9	IF;ICC;IHC	1	0	1	0	9	1	1	1	1	9	100	main	0	1	1	1	1	0	0	0	1	0	0	1	1	0	0	0	0	0	0	1	0	0	1	0	0
84	10.1002/cne.10578	http://doi.org/10.1002/cne.10578	JCN	1	1	38	2003-03-31	0	2002-07-15	0	7	WB;ICC	1	1	1	0	0	0	0	1	1	3	42.8571	main	1	1	1	1	1	0	1	0	1	1	1	1	1	0	0	0	0	0	0	0	9	9	9	9	9
85	10.1016/S0306-4522(03)00006-X	http://doi.org/10.1016/S0306-4522(03)00006-X	Neuroscience	3	0	28	2003-05-25	0	2003-01-03	0	4	radioimmunoassay; IHC	1	1	1	0	1	0	0	1	1	2	50	main	1	1	1	0	0	0	0	0	1	0	1	1	1	0	0	0	0	0	0	0	9	9	9	9	9
86	10.1016/S0306-4522(02)00409-8	http://doi.org/10.1016/S0306-4522(02)00409-8	Neuroscience	3	0	90	2002-11-15	0	2001-09-17	0	10	IHC	1	0	1	0	9	1	1	1	1	999	999	main	1	1	1	0	0	0	0	0	1	0	0	1	0	0	0	0	0	0	0	0	9	9	9	9	9
87	10.1126/science.1077426	http://doi.org/10.1126/science.1077426	Science	4	0	206	2002-12-06	0	2002-08-16	1	6	IF;WB	1	1	1	0	0	0	0	1	1	1	16.6667	main	1	9	0	0	0	0	0	0	1	1	0	0	0	0	0	0	0	0	0	0	9	9	9	9	9
88	10.1126/science.1081846	http://doi.org/10.1126/science.1081846	Science	4	0	141	2003-04-18	0	2002-12-23	0	10	IP; IF; WB	1	999	1	0	999	0	0	0	9	0	0	9	9	9	9	9	0	9	9	9	9	9	9	9	9	9	9	9	9	9	9	9	9	9	9	9	9
89	10.1038/nature01784	http://doi.org/10.1038/nature01784	Nature	2	1	411	2003-07-24	0	2003-04-08	1	18	IF; IHC; IP; WB	1	1	1	0	0	0	0	1	1	3	16.6667	main;SI	1	1	1	0	0	0	0	0	1	0	0	0	0	0	0	0	0	0	0	1	1	0	0	1	0
90	10.1038/nature01001	http://doi.org/10.1038/nature01001	Nature	2	1	105	2002-09-19	0	2002-01-29	0	2	IHC	1	0	1	0	9	0	0	0	9	0	0	9	9	9	9	9	0	9	9	9	9	9	9	9	9	9	9	9	9	9	9	9	9	9	9	9	9
91	10.1002/cne.24292	http://doi.org/10.1002/cne.24292	JCN	1	1	1	2017-12-01	1	2017-02-23	1	8	ICC	1	1	1	0	1	1	1	1	1	5	62.5	main	1	1	1	1	1	0	1	0	1	0	1	0	0	0	0	0	0	0	0	0	9	9	9	9	9
92	10.1002/cne.24216	http://doi.org/10.1002/cne.24216	JCN	1	1	5	2017-08-01	1	2016-10-19	1	3	IHC	1	1	1	1	1	1	1	1	1	2	66.6667	main	1	0	0	1	1	0	1	0	0	9	9	9	9	9	9	9	9	9	9	9	9	9	9	9	9
93	10.1016/j.neuroscience.2017.08.010	http://doi.org/10.1016/j.neuroscience.2017.08.010	Neuroscience	3	0	1	2017-10-11	1	2017-05-05	0	12	IF; WB; ELISA	1	0	1	0	0	0	0	1	1	4	33.3333	main	1	1	0	0	0	0	0	0	1	0	0	0	0	0	0	1	0	0	0	1	1	1	0	0	0
94	10.1016/j.neuroscience.2017.10.019	http://doi.org/10.1016/j.neuroscience.2017.10.019	Neuroscience	3	0	0	2017-12-26	1	2017-08-31	0	4	IHC	1	0	1	0	9	0	0	0	9	0	0	9	9	9	9	9	0	9	9	9	9	9	9	9	9	9	9	9	9	9	9	9	9	9	9	9	9
95	10.1126/science.aao0827	http://doi.org/10.1126/science.aao0827	Science	4	0	0	2018-01-05	1	2017-06-13	0	5	IHC; WB	1	0	1	0	9	0	0	1	1	1	20	SI	1	9	0	0	0	0	0	0	1	0	0	0	0	0	0	0	0	0	0	1	1	0	0	0	0
96	10.1126/science.aan6298	http://doi.org/10.1126/science.aan6298	Science	4	0	3	2017-11-10	1	2017-05-11	0	29	IF; WB; IP	1	0	1	0	9	0	0	1	1	3	10.3448	main;SI	1	1	0	0	0	0	0	0	1	0	0	0	0	0	0	0	0	0	0	1	1	0	0	0	0
97	10.1038/nature23478	http://doi.org/10.1038/nature23478	Nature	2	1	4	2017-09-07	1	2016-12-28	0	1	detect transfected cells with antibody-coated bead method	1	0	1	0	9	0	0	0	9	0	0	9	9	9	9	9	0	9	9	9	9	9	9	9	9	9	9	9	9	9	9	9	9	9	9	9	9
98	10.1038/nature23299	http://doi.org/10.1038/nature23299	Nature	2	1	4	2017-08-17	1	2017-02-14	1	9	IF	1	0	1	0	9	1	1	0	9	0	0	9	9	9	9	9	0	9	9	9	9	9	9	9	9	9	9	9	9	9	9	9	9	9	9	9	9
99	10.1002/cne.10345	http://doi.org/10.1002/cne.10345	JCN	1	1	62	2002-09-16	0	2001-11-20	0	3	IHC	1	999	1	0	9	0	0	1	0	1	33.3333	main	1	9	0	0	0	0	1	0	0	9	9	9	9	9	9	9	9	9	9	9	9	9	9	9	9
100	10.1002/cne.10331	http://doi.org/10.1002/cne.10331	JCN	1	1	40	2002-09-09	0	2002-02-28	1	12	ICC	1	1	1	0	0	0	0	1	1	3	25	main	1	0	0	0	0	0	1	0	0	9	9	9	9	9	9	9	9	9	9	9	9	9	9	9	9
101	10.1016/S0306-4522(02)00560-2	http://doi.org/10.1016/S0306-4522(02)00560-2	Neuroscience	3	0	152	2003-01-15	0	2002-08-01	0	3	ICC	1	0	1	0	9	0	0	0	9	0	0	9	9	9	9	9	0	9	9	9	9	9	9	9	9	9	9	9	9	9	9	9	9	9	9	9	9
102	10.1016/S0306-4522(02)00356-1	http://doi.org/10.1016/S0306-4522(02)00356-1	Neuroscience	3	0	36	2002-10-11	0	2001-11-15	0	9	WB; IP; ELISA	1	0	1	0	9	0	0	0	9	0	0	9	9	9	9	9	0	9	9	9	9	9	9	9	9	9	9	9	9	9	9	9	9	9	9	9	9
103	10.1126/science.1080386	http://doi.org/10.1126/science.1080386	Science	4	0	341	2003-04-11	0	2002-11-12	1	19	affinity purification; IP; WB	1	0	1	0	9	0	0	1	1	5	26.3158	main;SI	1	1	1	0	0	0	0	0	1	0	0	0	0	0	0	0	0	0	0	1	1	0	0	0	0
104	10.1126/science.1074962	http://doi.org/10.1126/science.1074962	Science	4	0	334	2002-11-29	0	2002-06-11	0	10	affinity purification; IP; depletion of cells with Ab; WB	1	1	1	0	0	0	0	1	1	1	10	main	1	9	0	0	0	0	0	0	1	0	0	0	0	0	0	0	0	0	0	1	1	0	0	0	0
105	10.1038/nature01202	http://doi.org/10.1038/nature01202	Nature	2	1	138	2002-12-26	0	2002-06-13	0	7	flow cytometry; ELISPOT; cell depletion	1	0	1	0	9	0	0	0	9	0	0	9	9	9	9	9	0	9	9	9	9	9	9	9	9	9	9	9	9	9	9	9	9	9	9	9	9
106	10.1038/nature00921	http://doi.org/10.1038/nature00921	Nature	2	1	374	2002-08-08	0	2002-03-08	0	4	WB; IP; IF	1	1	1	0	1	0	0	1	1	1	25	main	1	9	1	0	0	0	1	0	1	0	0	0	0	0	0	0	0	0	0	1	1	0	0	0	0
107	10.1002/cne.24339	http://doi.org/10.1002/cne.24339	JCN	1	1	1	2018-02-01	1	2017-05-09	1	6	IHC	1	1	1	0	1	1	1	1	1	5	83.3333	main	1	1	1	1	1	0	0	0	1	0	0	1	1	0	0	0	0	0	0	0	9	9	9	9	9
108	10.1002/cne.24226	http://doi.org/10.1002/cne.24226	JCN	1	1	3	2017-08-01	1	2017-02-02	1	5	ICC	1	0	1	0	9	1	1	1	1	4	80	main	1	1	1	1	1	1	1	0	1	0	1	0	0	0	0	0	0	0	0	0	9	9	9	9	9
109	10.1016/j.neuroscience.2018.01.056	http://doi.org/10.1016/j.neuroscience.2018.01.056	Neuroscience	3	0	0	2018-04-01	1	2017-10-12	0	4	IHC	1	1	1	0	0	0	0	1	1	1	25	main	1	9	0	0	0	0	1	0	0	9	9	9	9	9	9	9	9	9	9	9	9	9	9	9	9
110	10.1016/j.neuroscience.2017.11.054	http://doi.org/10.1016/j.neuroscience.2017.11.054	Neuroscience	3	0	0	2018-02-10	1	2017-08-17	0	3	immunostaining?	1	0	1	0	9	0	0	0	9	0	0	9	9	9	9	9	0	9	9	9	9	9	9	9	9	9	9	9	9	9	9	9	9	9	9	9	9
111	10.1126/science.aao3290	http://doi.org/10.1126/science.aao3290	Science	4	0	29	2018-01-05	1	2017-07-09	0	3	IHC; ELISPOT	1	0	1	999	9	999	999	0	9	0	0	9	9	9	9	9	0	9	9	9	9	9	9	9	9	9	9	9	9	9	9	9	9	9	9	9	9
112	10.1126/science.aah6834	http://doi.org/10.1126/science.aah6834	Science	4	0	0	2018-01-19	1	2016-07-31	1	20	WB	1	0	1	0	9	0	0	0	9	0	0	9	9	9	9	9	0	9	9	9	9	9	9	9	9	9	9	9	9	9	9	9	9	9	9	9	9
113	10.1038/nature22965	http://doi.org/10.1038/nature22965	Nature	2	1	10	2017-06-22	1	2016-10-24	1	22	WB; IP; IHC	1	1	1	0	0	0	0	1	1	6	27.2727	main;SI	1	1	1	0	0	0	0	0	1	0	0	0	0	0	0	0	0	0	0	1	1	0	0	0	0
114	10.1038/s41586-018-0081-7	http://doi.org/10.1038/s41586-018-0081-7	Nature	2	1	0	2018-05-10	1	2017-11-22	1	1	Antibody used to distinguish subunits of protein; used in Cryo-EM image collection	0	1	1	9	1	1	1	1	1	1	100	main	9	9	1	1	1	0	0	0	1	0	0	0	0	0	0	0	0	0	1	0	9	9	9	9	9
115	10.1038/nature26138	http://doi.org/10.1038/nature26138	Nature	2	1	1	2018-03-29	1	2017-06-27	1	19	WB;IF;immunostaining;IP;ChIP	1	0	1	0	9	999	999	1	999	999	999	main;SI	999	1	1	999	999	0	0	0	1	1	0	0	0	0	0	1	0	0	0	1	1	1	0	0	0
116	10.1002/cne.10683	http://doi.org/10.1002/cne.10683	JCN	1	1	22	2003-07-28	0	2001-08-17	1	8	ICC	1	1	1	0	1	1	1	1	0	5	62.5	main	1	0	0	0	0	0	1	0	0	9	9	9	9	9	9	9	9	9	9	9	9	9	9	9	9
117	10.1016/S0306-4522(02)00452-9	http://doi.org/10.1016/S0306-4522(02)00452-9	Neuroscience	3	0	49	2002-12-02	0	2002-02-20	0	12	ICC; double IF	1	1	1	0	0	0	0	0	9	0	0	9	9	9	9	9	0	9	9	9	9	9	9	9	9	9	9	9	9	9	9	9	9	9	9	9	9
118	10.1016/j.neuroscience.2017.05.015	http://doi.org/10.1016/j.neuroscience.2017.05.015	Neuroscience	3	0	0	2017-07-25	1	2016-12-14	0	4	IHC; FIHC (fluorescence immunohistochemistry)	1	0	1	0	9	1	1	0	9	0	0	9	9	9	9	9	0	9	9	9	9	9	9	9	9	9	9	9	9	9	9	9	9	9	9	9	9
119	10.1126/science.1073885	http://doi.org/10.1126/science.1073885	Science	4	0	192	2002-08-30	0	2002-05-13	0	6	ICC;IF	1	0	1	0	9	0	0	1	1	2	33.3333	SI	1	0	0	0	0	0	0	0	1	0	0	0	1	0	0	0	0	0	0	0	9	9	9	9	9
120	10.1126/science.aan1478	http://doi.org/10.1126/science.aan1478	Science	4	0	6	2017-10-27	1	2017-03-10	1	12	WB; electron microscopy	1	1	1	0	0	0	0	1	1	7	58.3333	main;SI	1	1	1	0	0	0	1	0	1	1	0	0	1	0	0	0	0	0	0	1	1	999	0	0	0
121	10.1038/nature01790	http://doi.org/10.1038/nature01790	Nature	2	1	301	2003-07-24	0	2003-04-04	1	11	WB; ICC;IHC;IP;flow cytometry	1	0	1	0	9	0	0	1	1	2	18.1818	main;SI	1	1	1	0	0	0	0	0	1	0	0	0	0	0	0	0	0	0	0	1	1	0	0	0	0
122	10.1002/cne.24346	http://doi.org/10.1002/cne.24346	JCN	1	1	0	2018-02-15	1	2017-05-10	1	4	ICC; immunogold staining	1	0	1	1	9	1	1	1	1	1	25	main	1	9	0	0	0	0	1	0	0	9	9	9	9	9	9	9	9	9	9	9	9	9	9	9	9
[truncated: 17 more columns]
